# Supplementary material for: Vagus Nerve Preservation for Early Distal Gastric Cancer With Monitoring and Indocyanine Green Labeling: A Randomized Clinical Trial
Source: PubMed Central journal article supplement (PMC11561724; doi:10.1001/jamasurg.2024.5077), 2024-11-13

## Supplemental Online Content

Yu W, Yan Z, Wei M, et al. Vagus nerve preservation for early distal gastric cancer with monitoring and indocyanine green labeling: a randomized clinical trial. *JAMA Surgery*. Published online November 13, 2024. doi:10.1001/jamasurg.2024.5077

**eTable 1.** Baseline Characteristics of Patients Pathologically Diagnosed as pT1N0M0

**eTable 2.** Surgical Outcomes of Patients Pathologically Diagnosed as pT1N0M0

**eTable 3.** Information on the Duration of PSG After Gastrectomy in Intention-to-Treat Analysis

**eTable 4.** The Proportion of Patients Developing Gallstones Within 3, 6, 9, and 12 Months After Gastrectomy in Intention-to-Treat Analysis

**eTable 5.** Quality of Life and Functional Outcome of Patients Followed by VPG and VRG Before Surgery, and 6, and 12 Months After Surgery in Intention-to-Treat Analysis

**eTable 6.** Quality of Life and Functional Outcome of Patients Followed by VPG and VRG Before Surgery, and 6, and 12 Months After Surgery in Per-Protocol Analysis

**eTable 7.** Quality of Life and Functional Outcomes in Patients Receiving Postoperative Adjuvant Chemotherapy Followed by VPG and VRG Before Surgery, and 6, and 12 Months After Surgery in Intention-to-Treat Analysis

**eTable 8.** Quality of Life and Functional Outcomes in Patients Not Receiving Postoperative Adjuvant Chemotherapy Followed by VPG and VRG Before Surgery, and 6, and 12 Months After Surgery in Intention-to-Treat Analysis

**eFigure 1.** Diagram For Perigastric Vagus Nerve and the Preservation of Vagus Nerve During Distal Gastrectomy

**eFigure 2.** The Preservation of the Vagus Nerve During Distal Gastrectomy

**eFigure 3.** The Functional Scales of the EORTC QLQ-C30

**eFigure 4.** The Fatigue, Pain, Dyspnea, and Insomnia Scales of the EORTC QLQ-C30

**eFigure 5.** The Constipation, Diarrhea, and Financial Difficulties Scales of the EORTC QLQ-C30

**eFigure 6.** The Dysphagia, Pain, and Anxiety Scales of the EORTC QLQ-STO22

**eFigure 7.** The Dry Mouth, Taste, Body Image, and Hair Loss Scales of the EORTC QLQ-STO22

This supplemental material has been provided by the authors to give readers additional information about their work.

**eTable 1.** Baseline Characteristics of Patients Pathologically Diagnosed as pT1N0M0

| Variables                        | Patients, No. (%)           |                  |                       |                  |
|----------------------------------|-----------------------------|------------------|-----------------------|------------------|
|                                  | Intention-to-treat analysis |                  | Per-protocol analysis |                  |
|                                  | VPG(N=109)                  | VRG(N=115)       | VPG(N=105)            | VRG(N=111)       |
| Gender                           |                             |                  |                       |                  |
| Male                             | 81(74.3)                    | 86(74.8)         | 78(74.3)              | 83(74.8)         |
| Female                           | 28(25.7)                    | 29(25.2)         | 27(25.7)              | 28(25.2)         |
| Age, median [IQR], years         | 59.0(54.0, 68.0)            | 58.0(52.0, 67.0) | 59.0(53.0, 69.0)      | 58.0(52.0, 67.0) |
| BMI, mean(SD), kg/m <sup>2</sup> | 24.97±3.32                  | 25.00±3.54       | 24.97±3.37            | 25.02±3.60       |
| Smoking                          |                             |                  |                       |                  |
| Yes                              | 74(67.9)                    | 62(53.9)         | 34(32.4)              | 51(45.9)         |
| No                               | 35(32.1)                    | 53(46.1)         | 71(67.6)              | 60(54.1)         |
| Alcohol consumption              |                             |                  |                       |                  |
| Yes                              | 81 (74.3)                   | 79 (68.7)        | 26(24.8)              | 34(30.6)         |
| No                               | 28 (25.7)                   | 36 (31.3)        | 79(75.2)              | 77(69.4)         |
| ASA                              |                             |                  |                       |                  |
| I                                | 22(20.2)                    | 34(29.6)         | 21(20.0)              | 34(30.6)         |
| II                               | 82(75.2)                    | 73(63.5)         | 79(75.2)              | 70(63.1)         |
| III                              | 5(4.6)                      | 8(7.0)           | 5(4.8)                | 7(6.3)           |
| Comorbidities                    |                             |                  |                       |                  |
| Diabetes                         | 23(17.4)                    | 37(28.0)         | 21(20.0)              | 32(28.8)         |
| CHD                              | 16(12.1)                    | 19(14.4)         | 15(14.3)              | 19(14.4)         |
| Hypertension                     | 27(20.5)                    | 32(24.2)         | 23(21.9)              | 32(28.8)         |
| Marital status                   |                             |                  |                       |                  |
| Married                          | 98(89.9)                    | 102(88.7)        | 94(89.5)              | 98(88.3)         |
| Unmarried                        | 11(10.1)                    | 13(11.3)         | 11(10.5)              | 13(11.7)         |
| Education                        |                             |                  |                       |                  |
| Primary or less                  | 19(17.4)                    | 20(17.4)         | 19(18.1)              | 20(18.0)         |
| High school                      | 47(43.1)                    | 48(41.7)         | 45(42.9)              | 46(41.4)         |
| University or college            | 43(39.4)                    | 47(40.9)         | 41(39.0)              | 45(40.5)         |
| Working status                   |                             |                  |                       |                  |
| Employed                         | 60(55.0)                    | 61(53.0)         | 58(55.2)              | 59(53.2)         |
| Unemployed                       | 49(45.0)                    | 54(47.0)         | 47(44.8)              | 52(46.8)         |
| Tumor size, mean(SD), mm         | 20.09±12.37                 | 20.13±12.25      | 20.18±12.59           | 20.15±12.45      |
| pT stage                         |                             |                  |                       |                  |
| T1a                              | 69(63.3)                    | 76(66.1)         | 67(63.8)              | 74(66.7)         |
| T1b                              | 40(36.7)                    | 39(33.9)         | 38(36.2)              | 37(33.3)         |
| pN stage                         |                             |                  |                       |                  |
| N0                               | 109(100.0)                  | 115(100.0)       | 105(100.0)            | 111(100.0)       |
| Histology                        |                             |                  |                       |                  |
| Differentiated                   | 54 (49.5)                   | 53 (46.1)        | 52(49.5)              | 52(46.8)         |
| Undifferentiated                 | 55 (50.5)                   | 62 (53.9)        | 53(50.5)              | 59(53.2)         |

| Variables           | Patients, No. (%)           |            |                       |            |
|---------------------|-----------------------------|------------|-----------------------|------------|
|                     | Intention-to-treat analysis |            | Per-protocol analysis |            |
|                     | VPG(N=109)                  | VRG(N=115) | VPG(N=105)            | VRG(N=111) |
| Anastomosis method  |                             |            |                       |            |
| Mini-laparotomy     | 47(43.1)                    | 50(43.5)   | 43(41.0)              | 46(41.4)   |
| Total-laparoscopic  | 62(56.9)                    | 65(56.5)   | 62(59.0)              | 65(58.6)   |
| Reconstruction type |                             |            |                       |            |
| Billroth I          | 1(0.9)                      | 3(2.6)     | 1(1.0)                | 3(2.7)     |
| Billroth II         | 107(98.2)                   | 110(95.7)  | 104(99.0)             | 108(97.3)  |
| Roux-en-Y           | 1(0.9)                      | 2(1.7)     | 0(0.0)                | 0(0.0)     |

**eTable 2.** Surgical Outcomes of Patients Pathologically Diagnosed as pT1N0M0

| Surgical Outcomes                            | Patients, No. (%)           |              |                |                       |              |                |
|----------------------------------------------|-----------------------------|--------------|----------------|-----------------------|--------------|----------------|
|                                              | Intention-to-treat analysis |              |                | Per-protocol analysis |              |                |
|                                              | VPG(N=109)                  | VRG (N=115)  | <i>P</i> value | VPG(N=105)            | VRG (N=111)  | <i>P</i> value |
| Operation time, mean(SD), min                | 196.58±24.25                | 180.02±20.11 | <0.001         | 195.93±24.18          | 178.48±18.17 | <0.001         |
| Blood loss, mean(SD), ml                     | 77.05±54.57                 | 78.73±55.33  | 0.82           | 72.18±20.92           | 73.77±13.32  | 0.50           |
| Surgeon                                      |                             |              | 0.10           |                       |              | 0.09           |
| A                                            | 83 (76.1)                   | 76 (66.1)    |                | 80(76.2)              | 73(65.8)     |                |
| B                                            | 26 (23.9)                   | 39 (33.9)    |                | 25(23.8)              | 38(34.2)     |                |
| Postoperative complications                  |                             |              | 0.56           |                       |              | 0.56           |
| Bleeding                                     | 1(0.8)                      | 1(0.8)       |                | 1(1.0)                | 1(0.9)       |                |
| Pancreatic fistula                           | 3(2.3)                      | 1(0.8)       |                | 3(2.9)                | 1(0.9)       |                |
| Anastomotic leakage                          | 0(0.0)                      | 1(0.8)       |                | 0(0.0)                | 1(0.9)       |                |
| Postoperative gastroparesis                  | 1( 0.9)                     | 9( 7.8)      | 0.03           | 1(1.0)                | 9(8.1)       | 0.03           |
| Gallstone                                    | 0(0.0)                      | 7( 6.1)      | 0.03           | 0(0.0)                | 7(6.3)       | 0.03           |
| Postoperative hospital stays, mean(SD), days | 8.16±2.29                   | 9.58±3.73    | <0.001         | 8.14±2.29             | 9.23±4.21    | 0.02           |
| Regular diet, mean(SD), weeks                | 6.84±1.18                   | 7.62±2.72    | 0.007          | 6.79±1.08             | 7.59±2.74    | 0.006          |
| Metastasis                                   | 0(0.0)                      | 1(0.9)       | >0.99          | 0(0.0)                | 1(0.9)       | >0.99          |
| Overall survival                             | 109(100)                    | 115(100)     | -              | 105(100)              | 111(100)     | -              |

**eTable 3.** Information on the Duration of PSG After Gastrectomy in Intention-to-Treat Analysis

| <b>Group</b> | <b>Time of diagnosed postoperation (day)</b> | <b>Time of duration (days)</b> | <b>The time to resume regular diet postoperation (week)</b> |
|--------------|----------------------------------------------|--------------------------------|-------------------------------------------------------------|
| VPG (N=1)    | 13                                           | 16                             | 6                                                           |
| VRG (N=10)   | 5                                            | 17                             | 12                                                          |
|              | 6                                            | 26                             | 14                                                          |
|              | 7                                            | 20                             | 7                                                           |
|              | 9                                            | 12                             | 8                                                           |
|              | 11                                           | 23                             | 16                                                          |
|              | 11                                           | 39                             | 15                                                          |
|              | 13                                           | 9                              | 6                                                           |
|              | 16                                           | 31                             | 11                                                          |
|              | 25                                           | 26                             | 12                                                          |
|              | 53                                           | 33                             | 26                                                          |

**eTable 4.** The Proportion of Patients Developing Gallstones Within 3, 6, 9, and 12 Months After Gastrectomy in Intention-to-Treat Analysis

| <b>Time spans</b> | <b>VPG (n=132)<br/>No. (%)</b> | <b>VRG (n=132)<br/>No. (%)</b> | <b>P value</b> |
|-------------------|--------------------------------|--------------------------------|----------------|
| Within 3 months   | 0(0.0)                         | 1(0.8)                         | >0.99          |
| Within 6 months   | 0(0.0)                         | 3(2.3)                         | 0.25           |
| Within 9 months   | 0(0.0)                         | 6(4.5)                         | 0.029          |
| Within 12 months  | 0(0.0)                         | 9(6.8)                         | 0.003          |

**eTable 5.** Quality of Life and Functional Outcome of Patients Followed by VPG and VRG Before Surgery, and 6, and 12 Months After Surgery in Intention-to-Treat Analysis

| <b>A. EORTC-QLQ-C30</b> |                       |                   |                   |                |                               |                   |                   |                |                                |                   |                   |                |
|-------------------------|-----------------------|-------------------|-------------------|----------------|-------------------------------|-------------------|-------------------|----------------|--------------------------------|-------------------|-------------------|----------------|
| <b>Variables</b>        | <b>Before surgery</b> |                   |                   |                | <b>6 months after surgery</b> |                   |                   |                | <b>12 months after surgery</b> |                   |                   |                |
|                         | <b>mean(SD)</b>       |                   | <b>Mean diff.</b> | <b>P value</b> | <b>mean(SD)</b>               |                   | <b>Mean diff.</b> | <b>P value</b> | <b>mean(SD)</b>                |                   | <b>Mean diff.</b> | <b>P value</b> |
|                         | <b>VPG(N=132)</b>     | <b>VRG(N=132)</b> |                   |                | <b>VPG(N=132)</b>             | <b>VRG(N=132)</b> |                   |                | <b>VPG(N=132)</b>              | <b>VRG(N=132)</b> |                   |                |
| <b>Function scales</b>  |                       |                   |                   |                |                               |                   |                   |                |                                |                   |                   |                |
| Global health status    | 76.98(8.81)           | 78.36(10.29)      | -1.38             | 0.241          | 56.23(9.27)                   | 57.39(9.6)        | -1.16             | 0.316          | 64.17(9.85)                    | 64.27(9.35)       | -0.10             | 0.929          |
| Physical functioning    | 87.51(7.53)           | 87.02(8.18)       | 0.49              | 0.611          | 70.59(9.63)                   | 69.83(9.4)        | 0.76              | 0.518          | 75.2(8.55)                     | 75.38(9.01)       | -0.18             | 0.872          |
| Emotional functioning   | 83.68(8.49)           | 84.95(8.44)       | -1.27             | 0.226          | 77.52(8.72)                   | 77.11(9.54)       | 0.41              | 0.717          | 85.16(8.33)                    | 83.86(8.91)       | 1.30              | 0.221          |
| Cognitive functioning   | 89.45(6.71)           | 88.79(6.55)       | 0.66              | 0.42           | 85.05(9.58)                   | 83.33(9.32)       | 1.72              | 0.141          | 86.68(7.3)                     | 87.48(7.3)        | -0.80             | 0.377          |
| Social functioning      | 87.82(7.58)           | 86.89(7.59)       | 0.93              | 0.319          | 70.88(8.86)                   | 72.2(10.33)       | -1.32             | 0.264          | 79.8(8.72)                     | 79.45(8.73)       | 0.35              | 0.746          |
| <b>Symptom scales</b>   |                       |                   |                   |                |                               |                   |                   |                |                                |                   |                   |                |
| Fatigue                 | 13.5(8.1)             | 12.55(7.78)       | 0.95              | 0.334          | 22.78(9.57)                   | 23.77(9.63)       | -0.99             | 0.406          | 19.06(10.05)                   | 17.9(8.83)        | 1.16              | 0.321          |
| Nausea and vomiting     | 10.55(7.46)           | 10.36(6.74)       | 0.19              | 0.836          | 17.15(9.21)                   | 19.38(7.62)       | -2.23             | 0.033          | 14.38(8.48)                    | 14.51(8.27)       | -0.13             | 0.901          |
| Pain                    | 10.77(7)              | 11.3(7.19)        | -0.53             | 0.539          | 12.64(7.97)                   | 13.83(9.17)       | -1.19             | 0.265          | 12.19(7.77)                    | 12.05(7.6)        | 0.14              | 0.879          |
| Insomnia                | 14.26(8.54)           | 15.62(8.58)       | -1.36             | 0.197          | 25.05(10.23)                  | 25.68(9.24)       | -0.63             | 0.601          | 19.66(8.57)                    | 19.43(8.96)       | 0.23              | 0.833          |
| Appetite loss           | 11.7(7.02)            | 11.38(7.27)       | 0.32              | 0.712          | 15.02(7.92)                   | 17.87(8.10)       | -2.85             | 0.004          | 11.66(7.77)                    | 14.97(7.56)       | -3.31             | 0.001          |
| Constipation            | 14.11(8.35)           | 13.32(8.77)       | 0.79              | 0.451          | 17.56(9.3)                    | 18.45(8.65)       | -0.89             | 0.424          | 15.4(8.89)                     | 15.01(9.07)       | 0.39              | 0.722          |
| Diarrhea                | 12.07(8.04)           | 12.5(8.27)        | -0.43             | 0.667          | 23.84(9.75)                   | 24.05(10.5)       | -0.21             | 0.865          | 18.14(9.11)                    | 18.51(8.63)       | -0.37             | 0.739          |
| Financial difficulties  | 13.73(7.87)           | 15.39(9.55)       | -1.66             | 0.126          | 24.44(9.95)                   | 25.67(8.93)       | -1.23             | 0.292          | 28.8(10.39)                    | 28.61(10.26)      | 0.19              | 0.877          |

**B. EORTC-QLQ-STO22**

| Variables  | Before surgery |              |            |         | 6 months after surgery |              |            |         | 12 months after surgery |             |            |         |
|------------|----------------|--------------|------------|---------|------------------------|--------------|------------|---------|-------------------------|-------------|------------|---------|
|            | mean(SD)       |              | Mean diff. | P value | mean(SD)               |              | Mean diff. | P value | mean(SD)                |             | Mean diff. | P value |
|            | VPG(N=132)     | VRG(N=132)   |            |         | VPG(N=132)             | VRG(N=132)   |            |         | VPG(N=132)              | VRG(N=132)  |            |         |
| Dysphagia  | 12.04(6.8)     | 12.45(7.48)  | -0.41      | 0.642   | 21.89(10.09)           | 20.01(9.63)  | 1.88       | 0.122   | 16.58(7.84)             | 15.84(8.85) | 0.74       | 0.476   |
| Pain       | 10.23(6.84)    | 10.27(6.76)  | -0.04      | 0.957   | 16.61(8.75)            | 16.48(8.12)  | 0.13       | 0.901   | 14.97(8.48)             | 14.36(7.15) | 0.61       | 0.531   |
| Reflux     | 11.44(6.9)     | 11.98(6.67)  | -0.54      | 0.514   | 15.57(8.63)            | 18.90(8.19)  | -3.33      | 0.001   | 12.59(8.42)             | 15.27(8.07) | -2.68      | 0.009   |
| Eating     | 10.61(6.91)    | 11.66(7.35)  | -1.05      | 0.231   | 15.51(8.17)            | 19.42(8.01)  | -3.91      | <0.001  | 13.07(9.09)             | 15.45(8.40) | -2.38      | 0.028   |
| Anxiety    | 31.02(9.44)    | 28.78(10.94) | 2.24       | 0.076   | 32.55(9.79)            | 32.02(10.67) | 0.53       | 0.674   | 25.42(10.06)            | 27.69(9.96) | -2.27      | 0.067   |
| Dry mouth  | 26.67(10.33)   | 24.63(9.37)  | 2.04       | 0.095   | 26.06(9.66)            | 26.74(8.87)  | -0.68      | 0.551   | 20.02(9.32)             | 21.64(9.3)  | -1.62      | 0.158   |
| Taste      | 11.04(7.06)    | 9.85(7.38)   | 1.19       | 0.182   | 14.33(8.47)            | 13.58(8.92)  | 0.75       | 0.488   | 12.22(7.68)             | 12.91(8.1)  | -0.69      | 0.479   |
| Body image | 15.23(8.92)    | 16.15(7.91)  | -0.92      | 0.378   | 22.73(9.61)            | 24.09(9.95)  | -1.36      | 0.261   | 18.51(7.57)             | 17.56(9.23) | 0.95       | 0.363   |
| Hair loss  | 34.67(10.1)    | 34.64(9.71)  | 0.03       | 0.985   | 39.51(9.94)            | 41.08(9.05)  | -1.57      | 0.179   | 46.16(9.47)             | 46.88(9.68) | -0.72      | 0.542   |



**eTable 6.** Quality of Life and Functional Outcome of Patients Followed by VPG and VRG Before Surgery, and 6, and 12 Months After Surgery in Per-Protocol Analysis

| <b>A. EORTC-QLQ-C30</b> |                       |                   |                   |                |                               |                   |                   |                |                                |                   |                   |                |
|-------------------------|-----------------------|-------------------|-------------------|----------------|-------------------------------|-------------------|-------------------|----------------|--------------------------------|-------------------|-------------------|----------------|
| <b>Variables</b>        | <b>Before surgery</b> |                   |                   |                | <b>6 months after surgery</b> |                   |                   |                | <b>12 months after surgery</b> |                   |                   |                |
|                         | <b>mean(SD)</b>       |                   | <b>Mean diff.</b> | <b>P value</b> | <b>mean(SD)</b>               |                   | <b>Mean diff.</b> | <b>P value</b> | <b>mean(SD)</b>                |                   | <b>Mean diff.</b> | <b>P value</b> |
|                         | <b>VPG(N=128)</b>     | <b>VRG(N=128)</b> |                   |                | <b>VPG(N=128)</b>             | <b>VRG(N=128)</b> |                   |                | <b>VPG(N=128)</b>              | <b>VRG(N=128)</b> |                   |                |
| <b>Function scales</b>  |                       |                   |                   |                |                               |                   |                   |                |                                |                   |                   |                |
| Global health status    | 76.95(8.95)           | 78.34(10.45)      | -1.39             | 0.254          | 56.23(9.42)                   | 57.41(9.75)       | -1.18             | 0.326          | 64.16(10.00)                   | 64.27(9.49)       | -0.12             | 0.923          |
| Physical functioning    | 87.52(7.64)           | 87.00(8.31)       | 0.52              | 0.606          | 70.59(9.78)                   | 69.82(9.53)       | 0.77              | 0.522          | 75.17(8.68)                    | 75.37(9.14)       | -0.20             | 0.861          |
| Emotional functioning   | 83.70(8.61)           | 84.97(8.56)       | -1.27             | 0.237          | 77.54(8.86)                   | 77.13(9.69)       | 0.41              | 0.722          | 85.16(8.46)                    | 83.86(9.04)       | 1.30              | 0.234          |
| Cognitive functioning   | 89.46(6.81)           | 88.81(6.65)       | 0.65              | 0.441          | 85.05(9.72)                   | 83.35(9.47)       | 1.70              | 0.159          | 86.71(7.40)                    | 87.52(7.40)       | -0.80             | 0.385          |
| Social functioning      | 87.84(7.70)           | 86.91(7.70)       | 0.92              | 0.339          | 70.86(8.99)                   | 72.20(10.49)      | -1.34             | 0.275          | 79.81(8.84)                    | 79.49(8.85)       | 0.32              | 0.772          |
| <b>Symptom scales</b>   |                       |                   |                   |                |                               |                   |                   |                |                                |                   |                   |                |
| Fatigue                 | 13.48(8.22)           | 12.56(7.90)       | 0.91              | 0.365          | 22.77(9.72)                   | 23.80(9.77)       | -1.03             | 0.398          | 19.05(10.21)                   | 17.94(8.96)       | 1.11              | 0.356          |
| Nausea and vomiting     | 10.56(7.58)           | 10.35(6.83)       | 0.21              | 0.815          | 17.14(9.34)                   | 19.37(7.73)       | -2.23             | 0.039          | 14.37(8.61)                    | 14.52(8.39)       | -0.16             | 0.883          |
| Pain                    | 10.73(7.10)           | 11.29(7.30)       | -0.55             | 0.538          | 12.68(8.09)                   | 13.84(9.31)       | -1.16             | 0.286          | 12.20(7.87)                    | 12.04(7.71)       | 0.16              | 0.873          |
| Insomnia                | 14.27(8.67)           | 15.63(8.70)       | -1.36             | 0.212          | 25.08(10.39)                  | 25.70(9.39)       | -0.63             | 0.614          | 19.66(8.69)                    | 19.43(9.10)       | 0.23              | 0.839          |
| Appetite loss           | 11.72(7.13)           | 11.39(7.38)       | 0.33              | 0.718          | 15.02(8.04)                   | 17.91(8.22)       | -2.88             | 0.005          | 11.68(7.89)                    | 14.98(7.68)       | -3.30             | 0.001          |
| Constipation            | 14.12(8.47)           | 13.34(8.90)       | 0.77              | 0.477          | 17.59(9.43)                   | 18.47(8.78)       | -0.88             | 0.439          | 15.39(9.02)                    | 15.00(9.21)       | 0.39              | 0.732          |
| Diarrhea                | 12.04(8.15)           | 12.51(8.39)       | -0.47             | 0.651          | 23.87(9.90)                   | 24.04(10.66)      | -0.17             | 0.894          | 18.15(9.25)                    | 18.49(8.75)       | -0.34             | 0.760          |
| Financial difficulties  | 13.76(7.98)           | 15.40(9.69)       | -1.64             | 0.141          | 24.43(10.09)                  | 25.70(9.06)       | -1.27             | 0.292          | 28.82(10.54)                   | 28.63(10.42)      | 0.19              | 0.886          |

**B. EORTC-QLQ-STO22**

| Variables  | Before surgery |              |            |         | 6 months after surgery |              |            |         | 12 months after surgery |              |            |         |
|------------|----------------|--------------|------------|---------|------------------------|--------------|------------|---------|-------------------------|--------------|------------|---------|
|            | mean(SD)       |              | Mean diff. | P value | mean(SD)               |              | Mean diff. | P value | mean(SD)                |              | Mean diff. | P value |
|            | VPG(N=128)     | VRG(N=128)   |            |         | VPG(N=128)             | VRG(N=128)   |            |         | VPG(N=128)              | VRG(N=128)   |            |         |
| Dysphagia  | 12.01(6.89)    | 12.41(7.59)  | -0.41      | 0.654   | 21.90(10.25)           | 20.00(9.78)  | 1.90       | 0.131   | 16.56(7.93)             | 15.85(8.98)  | 0.71       | 0.503   |
| Pain       | 10.22(6.93)    | 10.28(6.86)  | -0.06      | 0.942   | 16.63(8.87)            | 16.47(8.23)  | 0.16       | 0.884   | 14.98(8.58)             | 14.36(7.25)  | 0.63       | 0.530   |
| Reflux     | 11.45(6.99)    | 11.99(6.76)  | -0.55      | 0.525   | 15.59(8.75)            | 18.93(8.31)  | -3.34      | 0.002   | 12.58(8.55)             | 15.27(8.20)  | -2.70      | 0.011   |
| Eating     | 10.59(7.00)    | 11.68(7.46)  | -1.09      | 0.228   | 15.54(8.29)            | 19.43(8.13)  | -3.89      | <0.001  | 13.08(9.23)             | 15.45(8.52)  | -2.38      | 0.033   |
| Anxiety    | 31.04(9.58)    | 28.80(11.10) | 2.24       | 0.085   | 32.55(9.94)            | 32.03(10.82) | 0.52       | 0.687   | 25.42(10.21)            | 27.71(10.11) | -2.29      | 0.073   |
| Dry mouth  | 26.71(10.49)   | 24.64(9.51)  | 2.07       | 0.099   | 26.09(9.80)            | 26.74(9.01)  | -0.65      | 0.900   | 20.01(9.46)             | 21.61(9.44)  | -1.60      | 0.176   |
| Taste      | 11.04(7.16)    | 9.84(7.48)   | 1.20       | 0.193   | 14.34(8.59)            | 13.57(9.05)  | 0.77       | 0.484   | 12.23(7.80)             | 12.93(8.22)  | -0.70      | 0.488   |
| Body image | 15.23(9.06)    | 16.16(8.03)  | -0.92      | 0.390   | 22.75(9.76)            | 24.09(10.09) | -1.34      | 0.280   | 18.52(7.67)             | 17.55(9.37)  | 0.97       | 0.366   |
| Hair loss  | 34.69(10.25)   | 34.66(9.85)  | 0.02       | 0.985   | 39.54(10.08)           | 41.10(9.19)  | -1.56      | 0.196   | 46.19(9.60)             | 46.90(9.83)  | -0.71      | 0.559   |

**eTable 7.** Quality of Life and Functional Outcomes in Patients Receiving Postoperative Adjuvant Chemotherapy Followed by VPG and VRG Before Surgery, and 6, and 12 Months After Surgery in Intention-to-Treat Analysis

| <b>A. EORTC-QLQ-C30</b> |                       |                  |                   |                |                               |                  |                   |                |                                |                  |                   |                |
|-------------------------|-----------------------|------------------|-------------------|----------------|-------------------------------|------------------|-------------------|----------------|--------------------------------|------------------|-------------------|----------------|
| <b>Variables</b>        | <b>Before surgery</b> |                  |                   |                | <b>6 months after surgery</b> |                  |                   |                | <b>12 months after surgery</b> |                  |                   |                |
|                         | <b>mean(SD)</b>       |                  | <b>Mean diff.</b> | <b>P value</b> | <b>mean(SD)</b>               |                  | <b>Mean diff.</b> | <b>P value</b> | <b>mean(SD)</b>                |                  | <b>Mean diff.</b> | <b>P value</b> |
|                         | <b>VPG(N=18)</b>      | <b>VRG(N=14)</b> |                   |                | <b>VPG(N=18)</b>              | <b>VRG(N=14)</b> |                   |                | <b>VPG(N=18)</b>               | <b>VRG(N=14)</b> |                   |                |
| <b>Function scales</b>  |                       |                  |                   |                |                               |                  |                   |                |                                |                  |                   |                |
| Global health status    | 76.72 (10.75)         | 78.36 (11.57)    | -1.64             | 0.685          | 59.39 (9.03)                  | 60.36 (9.60)     | -0.97             | 0.773          | 62.56(14.37)                   | 66.86 (8.52)     | -4.30             | 0.301          |
| Physical functioning    | 86.50 (9.26)          | 87.93 (6.88)     | -1.43             | 0.620          | 72.72 (12.49)                 | 69.57 (6.69)     | 3.15              | 0.369          | 78.28 (9.17)                   | 76.21 (7.71)     | 2.07              | 0.494          |
| Emotional functioning   | 83.44 (8.33)          | 85.29 (10.70)    | -1.85             | 0.599          | 73.11 (6.49)                  | 73.21(11.16)     | -0.10             | 0.977          | 88.61 (8.35)                   | 79.57(10.75)     | 9.04              | 0.016          |
| Cognitive functioning   | 89.33 (6.76)          | 89.14 (5.79)     | 0.19              | 0.932          | 82.83 (12.84)                 | 82.93 (9.46)     | -0.10             | 0.980          | 85.11 (6.79)                   | 85.21 (8.08)     | -0.10             | 0.971          |
| Social functioning      | 88.61 (8.85)          | 87.57 (6.86)     | 1.04              | 0.711          | 71.33 (8.86)                  | 74.07 (9.58)     | -2.74             | 0.414          | 76.11 (7.32)                   | 81.71 (6.88)     | -5.60             | 0.034          |
| <b>Symptom scales</b>   |                       |                  |                   |                |                               |                  |                   |                |                                |                  |                   |                |
| Fatigue                 | 11.72 (7.39)          | 10.50 (7.99)     | 1.22              | 0.662          | 23.83 (10.64)                 | 29.14 (8.09)     | -5.31             | 0.119          | 16.78 (8.31)                   | 14.71 (7.09)     | 2.07              | 0.454          |
| Nausea and vomiting     | 11.56 (8.69)          | 8.71 (7.51)      | 2.85              | 0.328          | 19.22 (10.87)                 | 21.07 (7.96)     | -1.85             | 0.583          | 14.28 (9.08)                   | 14.14 (8.37)     | 0.14              | 0.964          |
| Pain                    | 9.28 (5.92)           | 13.21 (6.18)     | -3.93             | 0.080          | 10.78 (7.58)                  | 12.64 (9.60)     | -1.86             | 0.557          | 14.89 (7.58)                   | 10.71 (7.50)     | 4.18              | 0.131          |
| Insomnia                | 14.78 (6.35)          | 14.21 (10.02)    | 0.57              | 0.854          | 24.33 (11.60)                 | 27.71 (9.24)     | -3.38             | 0.366          | 18.78 (9.82)                   | 21.00 (8.53)     | -2.22             | 0.500          |
| Appetite loss           | 9.78 (5.93)           | 12.07 (9.29)     | -2.29             | 0.431          | 10.72 (6.97)                  | 16.29 (7.71)     | -5.57             | 0.044          | 10.11 (6.43)                   | 13.36 (7.89)     | -3.25             | 0.222          |
| Constipation            | 13.44 (9.08)          | 14.29 (8.61)     | -0.85             | 0.789          | 13.11 (9.26)                  | 16.21 (8.99)     | -3.10             | 0.348          | 16.00 (8.35)                   | 14.64 (8.17)     | 1.36              | 0.647          |
| Diarrhea                | 10.89 (8.64)          | 11.14 (8.51)     | -0.25             | 0.935          | 21.61 (9.94)                  | 24.64 (8.46)     | -3.03             | 0.360          | 18.78 (6.83)                   | 18.64(10.04)     | 0.14              | 0.965          |
| Financial difficulties  | 13.67 (7.80)          | 12.36 (10.13)    | 1.31              | 0.692          | 24.89 (11.43)                 | 21.57 (7.72)     | 3.32              | 0.336          | 23.56(11.23)                   | 35.21(10.44)     | -11.65            | 0.005          |

**B. EORTC-QLQ-STO22**

| Variables  | Before surgery |               |            |         | 6 months after surgery |               |            |         | 12 months after surgery |               |            |         |
|------------|----------------|---------------|------------|---------|------------------------|---------------|------------|---------|-------------------------|---------------|------------|---------|
|            | mean(SD)       |               | Mean diff. | P value | mean(SD)               |               | Mean diff. | P value | mean(SD)                |               | Mean diff. | P value |
|            | VPG(N=18)      | VRG(N=14)     |            |         | VPG(N=18)              | VRG(N=14)     |            |         | VPG(N=18)               | VRG(N=14)     |            |         |
| Dysphagia  | 14.00 (8.76)   | 12.71 (7.69)  | 1.29       | 0.661   | 21.78 (12.71)          | 26.50 (11.15) | -4.72      | 0.273   | 13.17 (7.92)            | 13.00 (8.16)  | 0.17       | 0.953   |
| Pain       | 10.00 (6.45)   | 7.64 (5.36)   | 2.36       | 0.268   | 17.39 (8.76)           | 14.79 (4.77)  | 2.60       | 0.293   | 15.56 (7.90)            | 15.36 (10.46) | 0.20       | 0.953   |
| Reflux     | 8.61 (6.41)    | 10.79 (8.12)  | -2.18      | 0.418   | 13.11 (8.09)           | 17.93 (6.11)  | -4.82      | 0.064   | 8.89 (6.84)             | 16.79 (8.17)  | -7.90      | 0.007   |
| Eating     | 10.56 (7.38)   | 10.57 (7.36)  | -0.01      | 0.997   | 15.83 (6.53)           | 19.00 (9.11)  | -3.17      | 0.283   | 16.06 (11.26)           | 18.36 (6.92)  | -2.30      | 0.483   |
| Anxiety    | 36.06 (8.04)   | 33.50 (8.71)  | 2.56       | 0.401   | 35.56 (10.94)          | 30.86 (8.77)  | 4.70       | 0.188   | 27.61 (12.93)           | 24.50 (13.73) | 3.11       | 0.520   |
| Dry mouth  | 29.06 (8.07)   | 24.14 (8.44)  | 4.92       | 0.107   | 24.94 (9.36)           | 31.64 (8.78)  | -6.70      | 0.046   | 20.22 (11.04)           | 22.29 (8.95)  | -2.07      | 0.562   |
| Taste      | 9.50 (8.87)    | 8.07 (6.18)   | 1.43       | 0.595   | 12.17 (7.11)           | 14.50 (9.22)  | -2.33      | 0.442   | 10.78 (8.08)            | 13.64 (8.12)  | -2.86      | 0.330   |
| Body image | 15.39 (9.13)   | 17.29 (7.26)  | -1.90      | 0.517   | 25.39 (9.01)           | 23.93 (13.46) | 1.46       | 0.730   | 19.33 (5.36)            | 16.64 (8.27)  | 2.69       | 0.303   |
| Hair loss  | 36.39 (8.08)   | 32.57 (12.56) | 3.82       | 0.334   | 38.17 (7.88)           | 45.57 (9.75)  | -7.40      | 0.029   | 43.39 (10.64)           | 47.86 (8.85)  | -4.47      | 0.205   |

**eTable 8.** Quality of Life and Functional Outcomes in Patients Not Receiving Postoperative Adjuvant Chemotherapy Followed by VPG and VRG Before Surgery, and 6, and 12 Months After Surgery in Intention-to-Treat Analysis

| <b>A. EORTC-QLQ-C30</b> |                       |                   |                   |                |                               |                   |                   |                |                                |                   |                   |                |
|-------------------------|-----------------------|-------------------|-------------------|----------------|-------------------------------|-------------------|-------------------|----------------|--------------------------------|-------------------|-------------------|----------------|
| <b>Variables</b>        | <b>Before surgery</b> |                   |                   |                | <b>6 months after surgery</b> |                   |                   |                | <b>12 months after surgery</b> |                   |                   |                |
|                         | <b>mean(SD)</b>       |                   | <b>Mean diff.</b> | <b>P value</b> | <b>mean(SD)</b>               |                   | <b>Mean diff.</b> | <b>P value</b> | <b>mean(SD)</b>                |                   | <b>Mean diff.</b> | <b>P value</b> |
|                         | <b>VPG(N=114)</b>     | <b>VRG(N=118)</b> |                   |                | <b>VPG(N=114)</b>             | <b>VRG(N=118)</b> |                   |                | <b>VPG(N=114)</b>              | <b>VRG(N=118)</b> |                   |                |
| <b>Function scales</b>  |                       |                   |                   |                |                               |                   |                   |                |                                |                   |                   |                |
| Global health status    | 77.02 (8.52)          | 78.36 (10.19)     | -1.34             | 0.278          | 55.73 (9.25)                  | 57.04 (9.58)      | -1.31             | 0.290          | 64.42 (9.00)                   | 63.97 (9.43)      | 0.45              | 0.710          |
| Physical functioning    | 87.67 (7.26)          | 86.91 (8.34)      | 0.76              | 0.459          | 70.25 (9.12)                  | 69.86 (9.69)      | 0.39              | 0.752          | 74.72 (8.39)                   | 75.28 (9.17)      | -0.56             | 0.628          |
| Emotional functioning   | 83.72 (8.55)          | 84.91 (8.18)      | -1.19             | 0.280          | 78.22 (8.85)                  | 77.58 (9.28)      | 0.64              | 0.591          | 84.61 (8.23)                   | 84.36 (8.57)      | 0.25              | 0.821          |
| Cognitive functioning   | 89.46 (6.73)          | 88.75 (6.66)      | 0.71              | 0.420          | 85.39 (8.98)                  | 83.37 (9.35)      | 2.02              | 0.095          | 86.93 (7.38)                   | 87.75 (7.20)      | -0.82             | 0.393          |
| Social functioning      | 87.69 (7.40)          | 86.81 (7.69)      | 0.88              | 0.375          | 70.81 (8.89)                  | 71.98(10.43)      | -1.17             | 0.358          | 80.39 (8.80)                   | 79.19 (8.92)      | 1.20              | 0.303          |
| <b>Symptom scales</b>   |                       |                   |                   |                |                               |                   |                   |                |                                |                   |                   |                |
| Fatigue                 | 13.78 (8.20)          | 12.80 (7.75)      | 0.98              | 0.351          | 22.61 (9.43)                  | 23.13 (9.63)      | -0.52             | 0.678          | 19.42(10.29)                   | 18.28 (8.96)      | 1.14              | 0.370          |
| Nausea and vomiting     | 10.39 (7.28)          | 10.56 (6.65)      | -0.17             | 0.853          | 16.82 (8.93)                  | 19.18 (7.59)      | -2.36             | 0.031          | 14.39 (8.42)                   | 14.55 (8.29)      | -0.16             | 0.884          |
| Pain                    | 11.00 (7.15)          | 11.08 (7.29)      | -0.08             | 0.933          | 12.94 (8.02)                  | 13.97 (9.15)      | -1.03             | 0.362          | 11.76 (7.74)                   | 12.20 (7.62)      | -0.44             | 0.663          |
| Insomnia                | 14.18 (8.86)          | 15.79 (8.43)      | -1.61             | 0.158          | 25.17 (10.05)                 | 25.44 (9.25)      | -0.27             | 0.832          | 19.80 (8.39)                   | 19.25 (9.03)      | 0.55              | 0.631          |
| Appetite loss           | 12.01 (7.16)          | 11.30 (7.04)      | 0.71              | 0.447          | 15.69 (7.88)                  | 18.06 (8.16)      | -2.37             | 0.025          | 11.90 (7.96)                   | 15.16 (7.53)      | -3.26             | 0.002          |
| Constipation            | 14.22 (8.27)          | 13.20 (8.81)      | 1.02              | 0.364          | 18.26 (9.15)                  | 18.71 (8.61)      | -0.45             | 0.700          | 15.31 (9.01)                   | 15.05 (9.21)      | 0.26              | 0.828          |
| Diarrhea                | 12.25 (7.96)          | 12.66 (8.26)      | -0.41             | 0.701          | 24.19 (9.72)                  | 23.98(10.75)      | 0.21              | 0.876          | 18.04 (9.44)                   | 18.49 (8.49)      | -0.45             | 0.703          |
| Financial difficulties  | 13.75 (7.92)          | 15.75 (9.45)      | -2.00             | 0.082          | 24.37 (9.75)                  | 26.15 (8.96)      | -1.78             | 0.149          | 29.63(10.05)                   | 27.82(10.00)      | 1.81              | 0.171          |

**B. EORTC-QLQ-STO22**

| Variables  | Before surgery |               |            |         | 6 months after surgery |               |            |         | 12 months after surgery |              |            |         |
|------------|----------------|---------------|------------|---------|------------------------|---------------|------------|---------|-------------------------|--------------|------------|---------|
|            | mean(SD)       |               | Mean diff. | P value | mean(SD)               |               | Mean diff. | P value | mean(SD)                |              | Mean diff. | P value |
|            | VPG(N=114)     | VRG(N=118)    |            |         | VPG(N=114)             | VRG(N=118)    |            |         | VPG(N=114)              | VRG(N=118)   |            |         |
| Dysphagia  | 11.73 (6.43)   | 12.42 (7.49)  | -0.69      | 0.452   | 21.91 (9.69)           | 19.24 (9.19)  | 2.67       | 0.032   | 17.11 (7.72)            | 16.18 (8.90) | 0.93       | 0.396   |
| Pain       | 10.26 (6.93)   | 10.58 (6.86)  | -0.32      | 0.724   | 16.49 (8.79)           | 16.69 (8.42)  | -0.20      | 0.860   | 14.88 (8.60)            | 14.25 (6.70) | 0.63       | 0.535   |
| Reflux     | 11.89 (6.90)   | 12.13 (6.50)  | -0.24      | 0.785   | 15.96 (8.68)           | 19.02 (8.42)  | -3.06      | 0.007   | 13.18 (8.53)            | 15.08 (8.08) | -1.90      | 0.083   |
| Eating     | 10.61 (6.87)   | 11.79 (7.37)  | -1.18      | 0.208   | 15.46 (8.42)           | 19.47 (7.91)  | -4.01      | <0.001  | 12.60 (8.66)            | 15.10 (8.51) | -2.50      | 0.028   |
| Anxiety    | 30.23 (9.43)   | 28.22 (11.07) | 2.01       | 0.137   | 32.07 (9.56)           | 32.15 (10.90) | -0.08      | 0.953   | 25.08 (9.55)            | 28.07 (9.42) | -2.99      | 0.017   |
| Dry mouth  | 26.29 (10.63)  | 24.69 (9.51)  | 1.60       | 0.229   | 26.24 (9.73)           | 26.16 (8.74)  | 0.08       | 0.948   | 19.98 (9.07)            | 21.56 (9.38) | -1.58      | 0.193   |
| Taste      | 11.28 (6.75)   | 10.06 (7.50)  | 1.22       | 0.194   | 14.67 (8.64)           | 13.47 (8.91)  | 1.20       | 0.299   | 12.45 (7.63)            | 12.82 (8.13) | -0.37      | 0.721   |
| Body image | 15.21 (8.93)   | 16.02 (8.00)  | -0.81      | 0.468   | 22.32 (9.68)           | 24.11 (9.52)  | -1.79      | 0.157   | 18.38 (7.87)            | 17.67 (9.37) | 0.71       | 0.532   |
| Hair loss  | 34.39 (10.39)  | 34.89 (9.36)  | -0.50      | 0.701   | 39.72 (10.24)          | 40.55 (8.85)  | -0.83      | 0.510   | 46.60 (9.25)            | 46.76 (9.80) | -0.16      | 0.898   |

**eFigure 1.** Diagram For Perigastric Vagus Nerve and the Preservation of Vagus Nerve During Distal Gastrectomy

A.

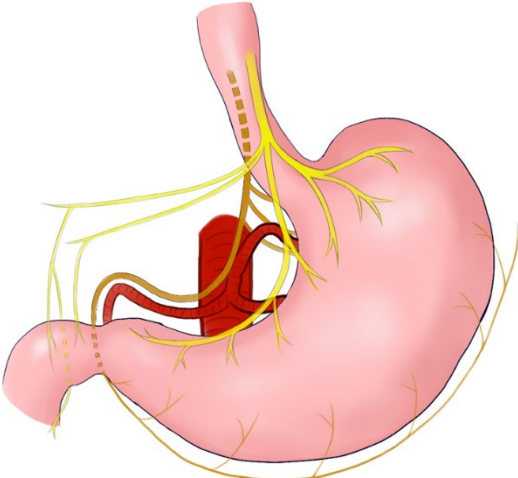

B.

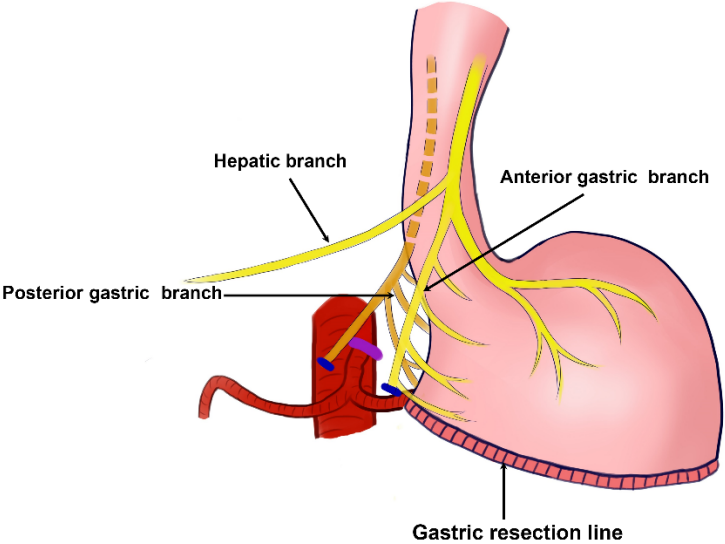

**eFigure 2.** The Preservation of the Vagus Nerve During Distal Gastrectomy

A.

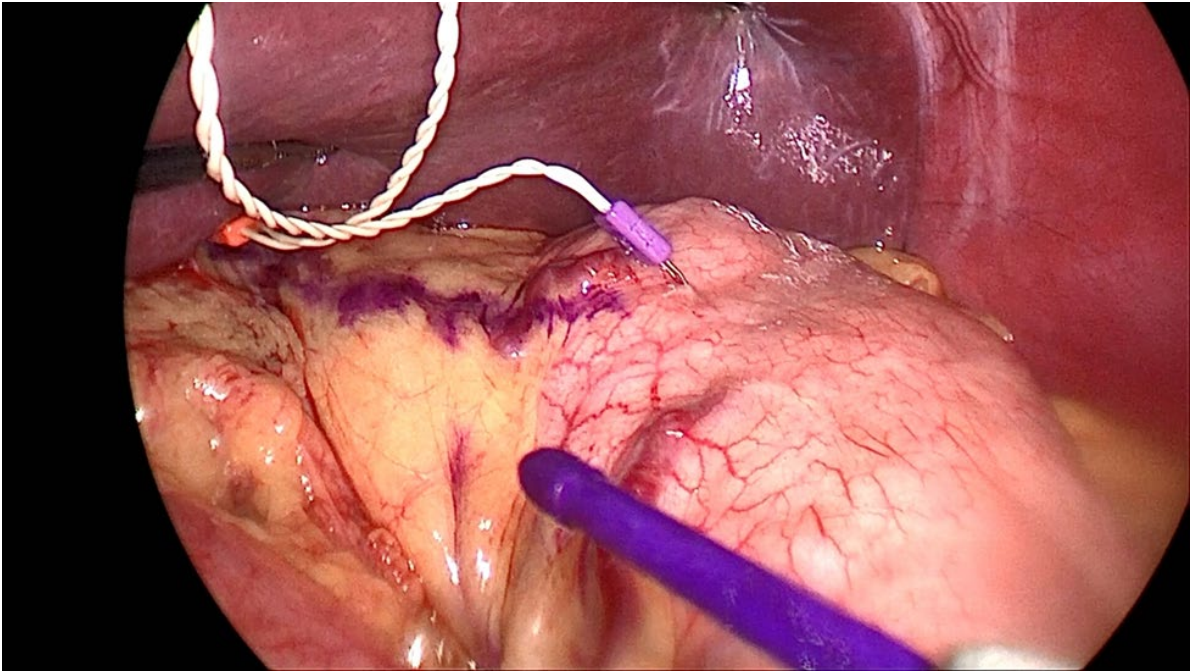

B.

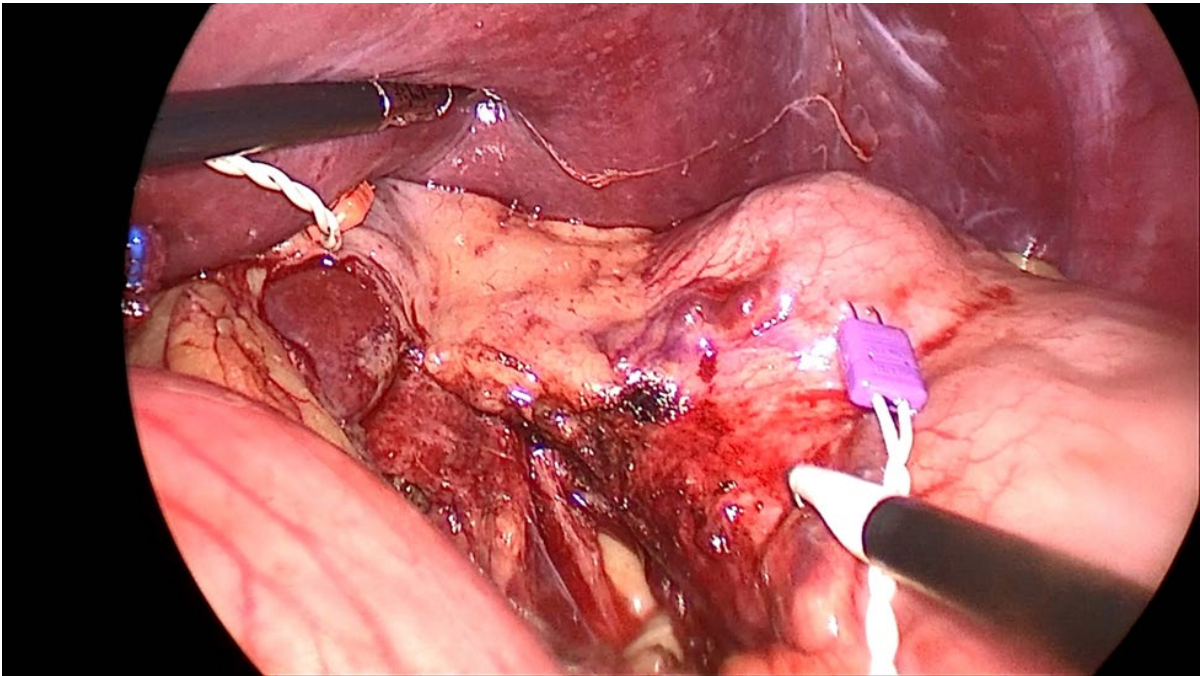



eFigure 3. The Functional Scales of the EORTC QLQ-C30

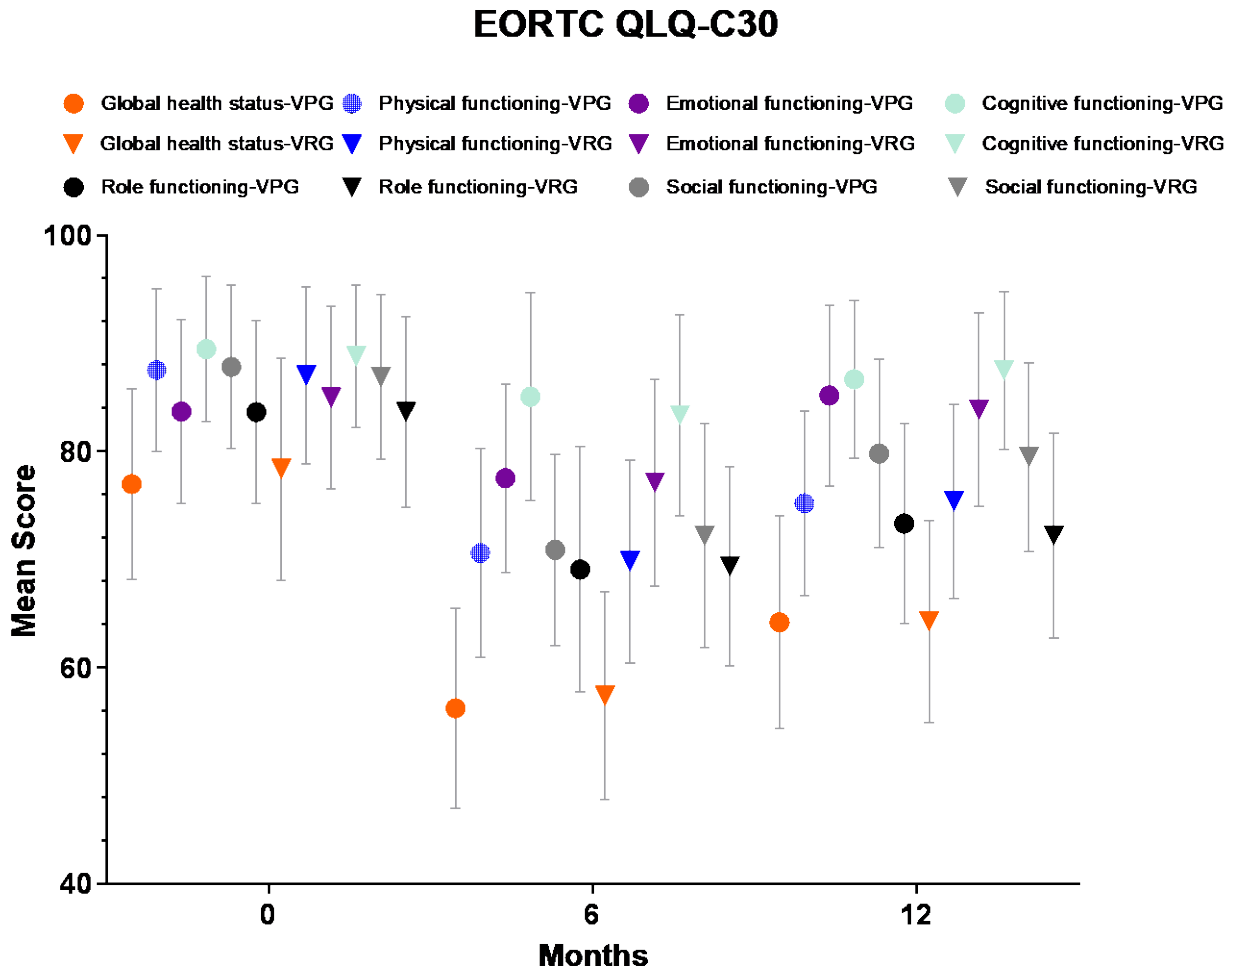

**eFigure 4.** The Fatigue, Pain, Dyspnea, and Insomnia Scales of the EORTC QLQ-C30

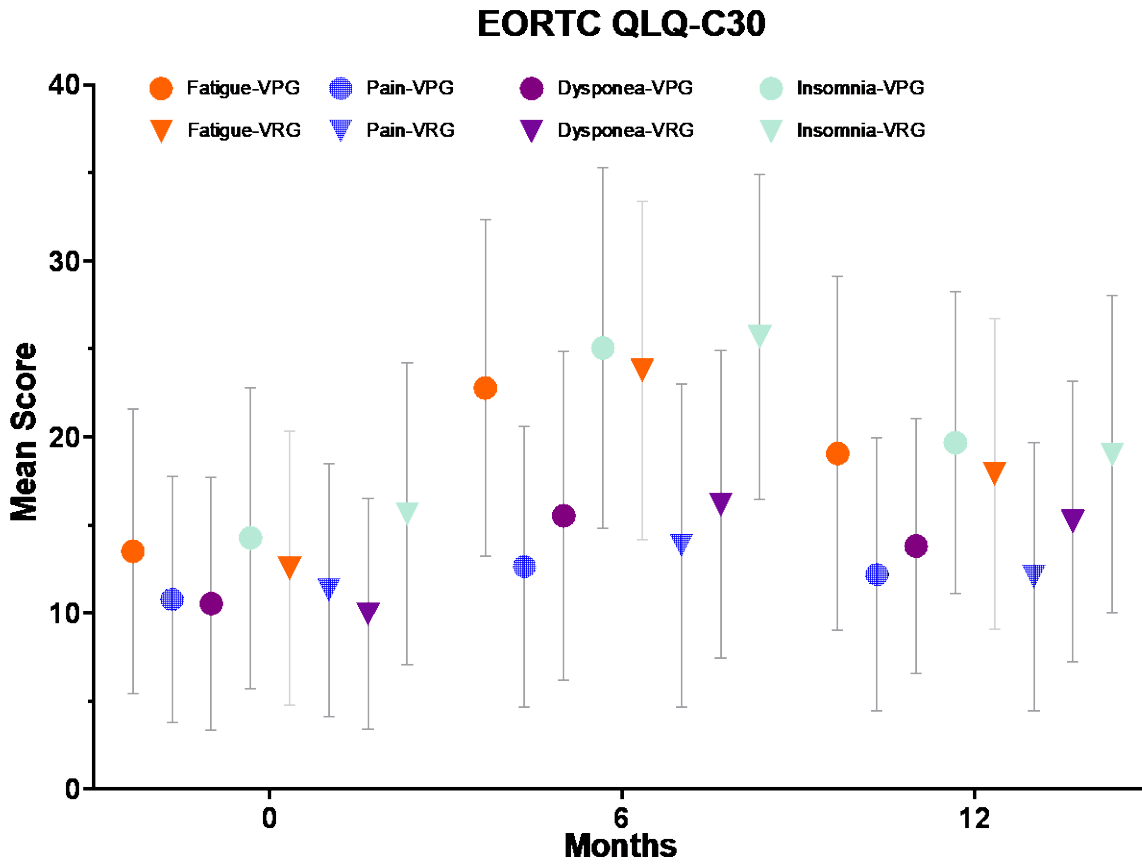

**eFigure 5.** The Constipation, Diarrhea, and Financial Difficulties Scales of the EORTC QLQ-C30

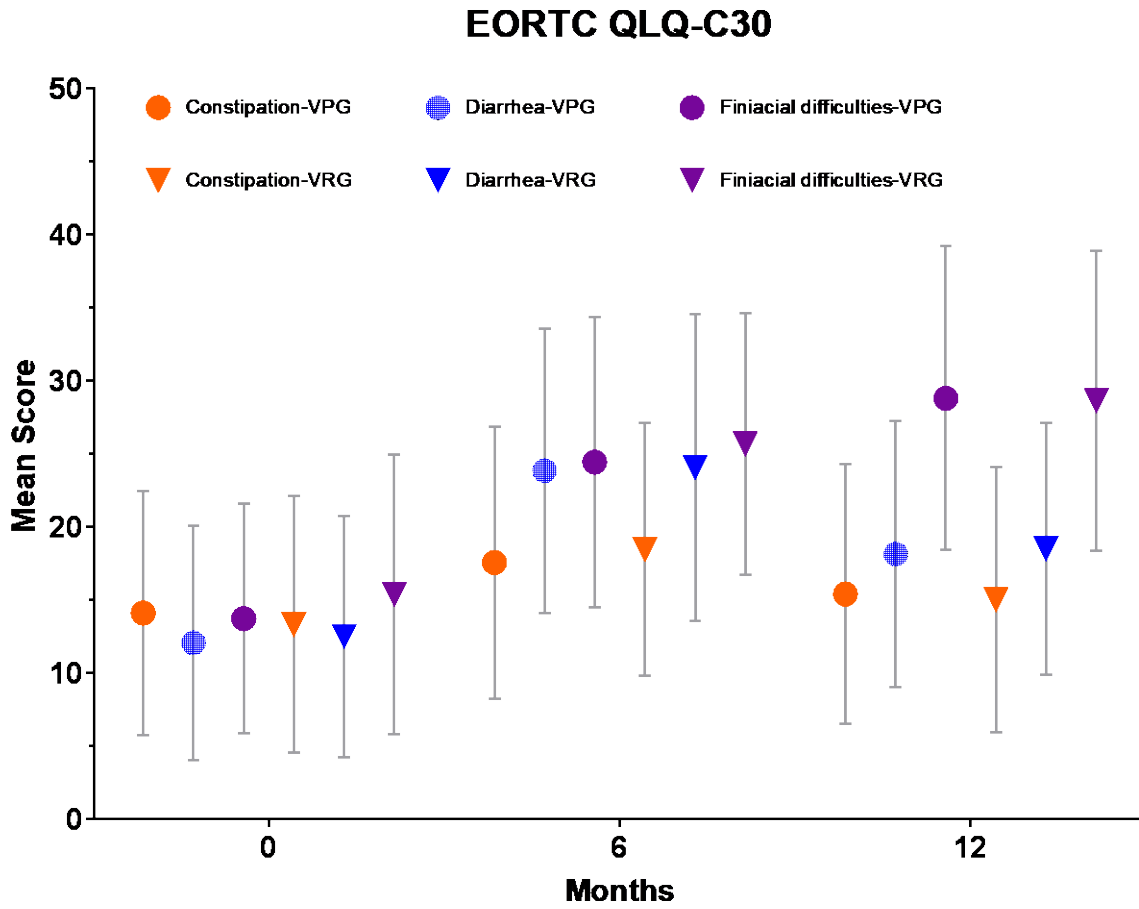

**eFigure 6.** The Dysphagia, Pain, and Anxiety Scales of the EORTC QLQ-STO22

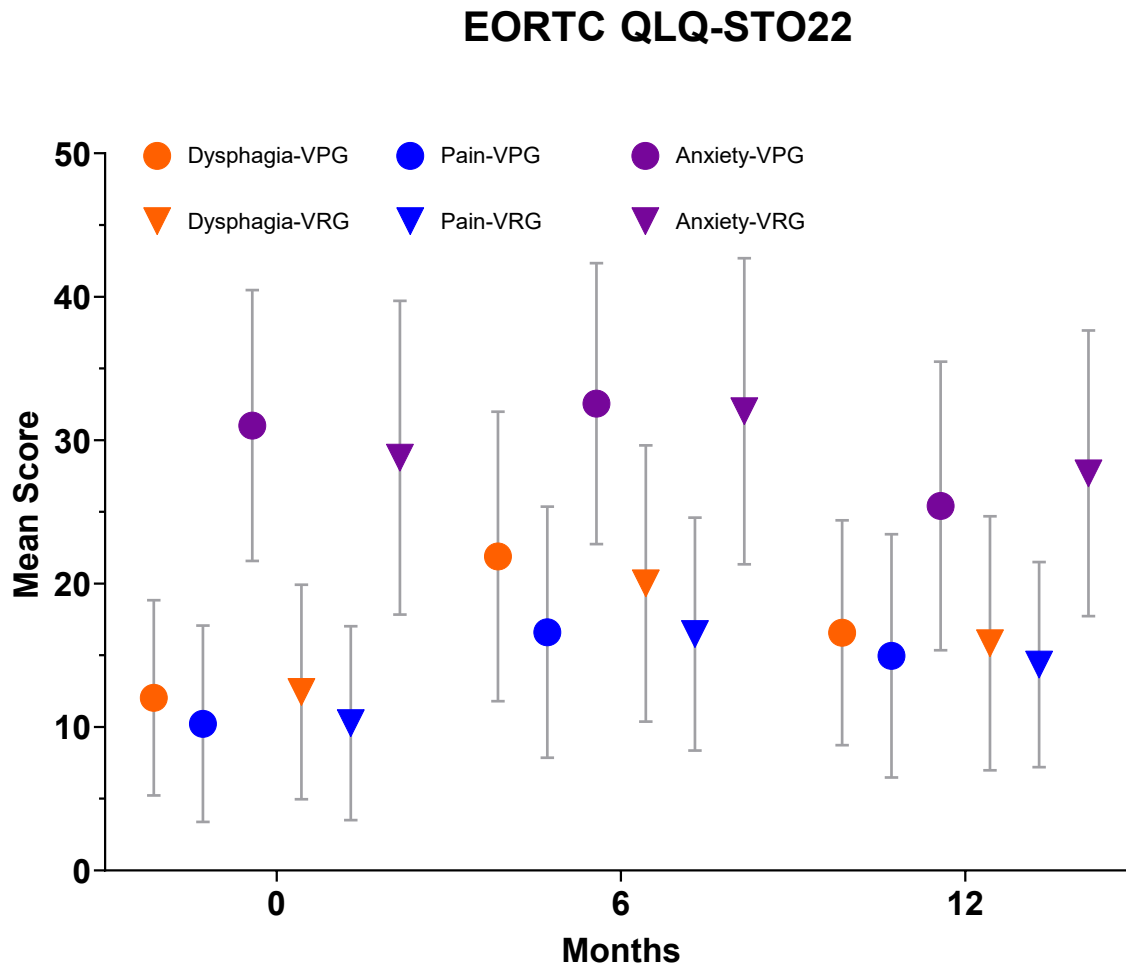

eFigure 7. The Dry Mouth, Taste, Body Image, and Hair Loss Scales of the EORTC QLQ-STO22

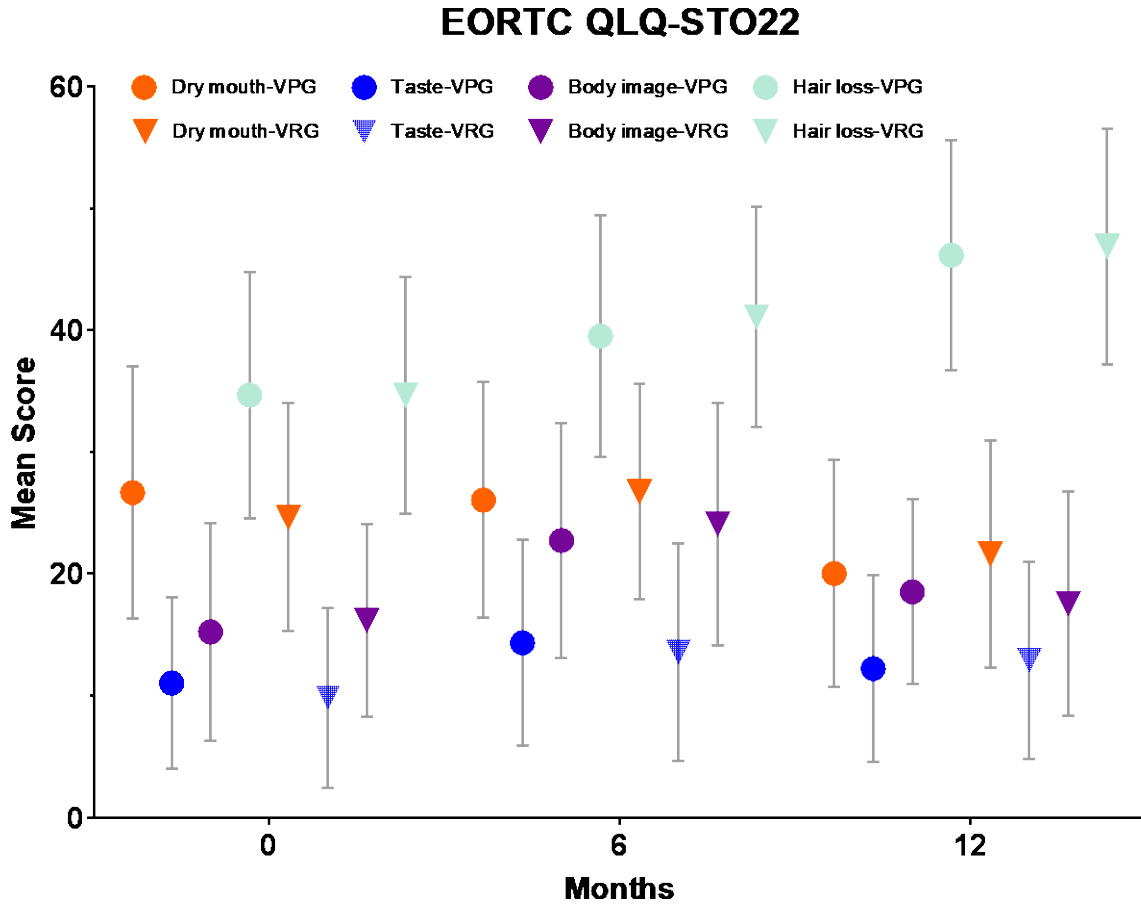

Supplement: jamasurg-e245077-s002.pdf [file jamasurg-e245077-s002.pdf]
