# Supplementary material for: Vagus Nerve Preservation for Early Distal Gastric Cancer With Monitoring and Indocyanine Green Labeling: A Randomized Clinical Trial
Source: PubMed Central journal article supplement (PMC11561724; doi:10.1001/jamasurg.2024.5077), 2024-11-13
Supplement: jamasurg-e245077-s003.pdf [file jamasurg-e245077-s003.pdf]

## Data Sharing Statement

Yan. Vagus Nerve Preservation for Early Distal Gastric Cancer With Monitoring and Indocyanine Green Labeling. *JAMA Surg.* Published November 13, 2024.

doi:10.1001/jamasurg.2024.5077

### Data

**Additional Information:** Chictr.org.cn <https://www.chictr.org.cn/showprojEN.html?proj=166485>  
ChiCTR2200059489

**Data available:** Yes

**Data types:** Deidentified participant data

**How to access data:** How to access data: [wenbin\\_yu2003@163.com](mailto:wenbin_yu2003@163.com) When available: With publication Supporting Documents Document types: Other (please specify) Additional Information: Trial protocol How to access documents: [wenbin\\_yu2003@163.com](mailto:wenbin_yu2003@163.com) When available: With publication Additional Information Who can access the data: Wenbin Yu Types of analyses: for a specified purpose Mechanisms of data availability: after approval of a proposal

**When available:** With publication

### Supporting Documents

**Document types:** Informed consent form

**How to access documents:** Who can access the data: Wenbin Yu

**When available:** With publication

### Additional Information

**Who can access the data:** Who can access the data: Wenbin Yu

**Types of analyses:** all the analysis data

**Mechanisms of data availability:** Mechanisms of data availability: after approval of a proposal
